# Supplementary material for: Targeting with Structural Analogs of Natural Products the Purine Salvage Pathway in Leishmania (Leishmania) infantum by Computer-Aided Drug-Design Approaches
Source: MDPI journal article supplement (doi:10.3390/tropicalmed9020041), 2024-02-03
Supplement: s1 [file s1]

# Supplementary Materials: Targeting with structural analogs of natural products the purine salvage pathway in *Leishmania* (*Leishmania*) *infantum* by computer-aided drug design approaches

Haruna Luz Barazorda-Ccahuana<sup>1</sup> , Eymi Gladys Cárcamo-Rodríguez<sup>1,2</sup> , Angela Emperatriz Centeno-Lopez<sup>1,2</sup> ,  
Alexsandro Sobreira Galdino<sup>3</sup> , Ricardo Andrez Machado-de-Ávila<sup>4</sup> , Rodolfo Cordeiro Giunchetti<sup>5,6</sup> , Eduardo  
Antonio Ferraz Coelho<sup>7,8</sup> , Miguel Angel Chávez-Fumagalli<sup>1</sup> \*

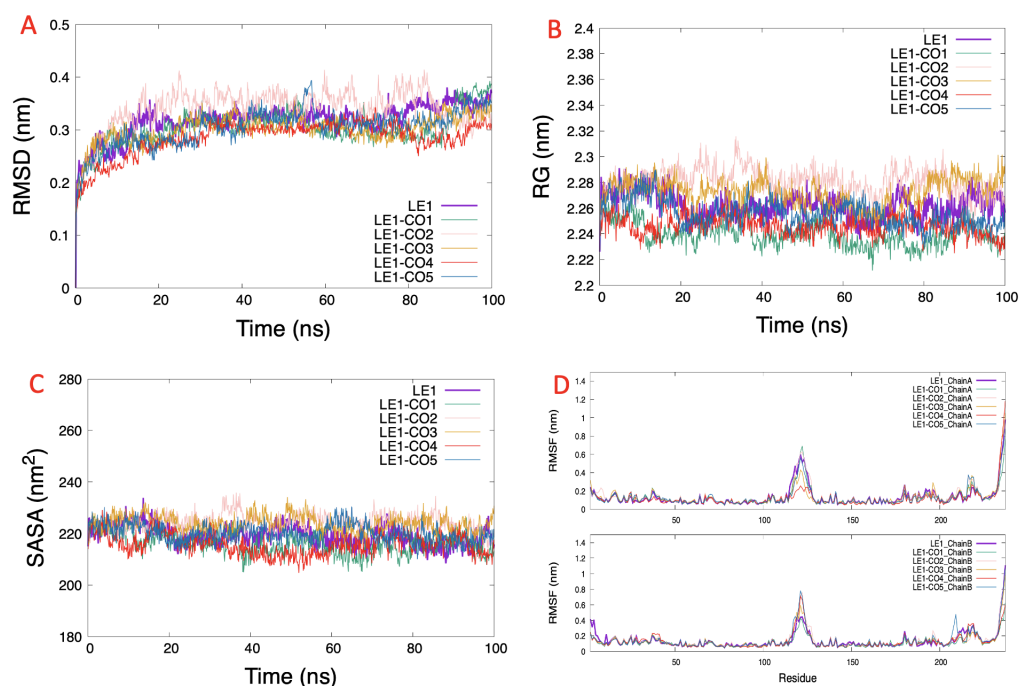

**Figure S1.** RMSD, SASA, and RG analysis of Adenine phosphoribosyltransferase. (A) RMSD graph. (B) RG graph. (C) SASA graph. (D) RMSF graph.

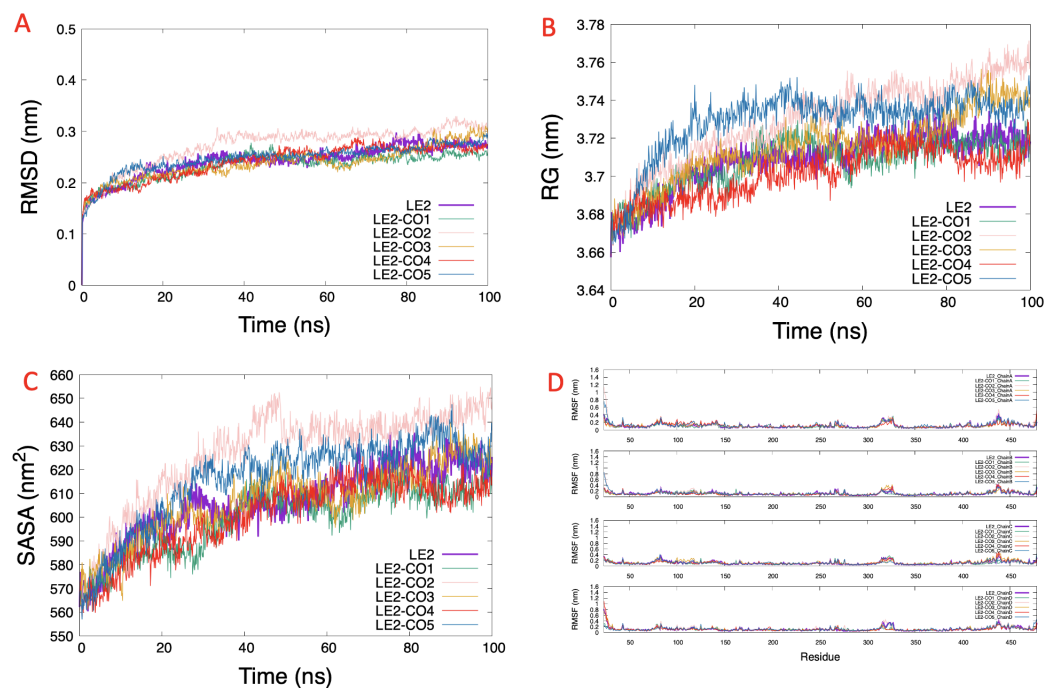

**Figure S2.** RMSD, SASA, and RG analysis of Adenylosuccinate lyase. (A) RMSD graph. (B) RG graph. (C) SASA graph. (D) RMSF graph.

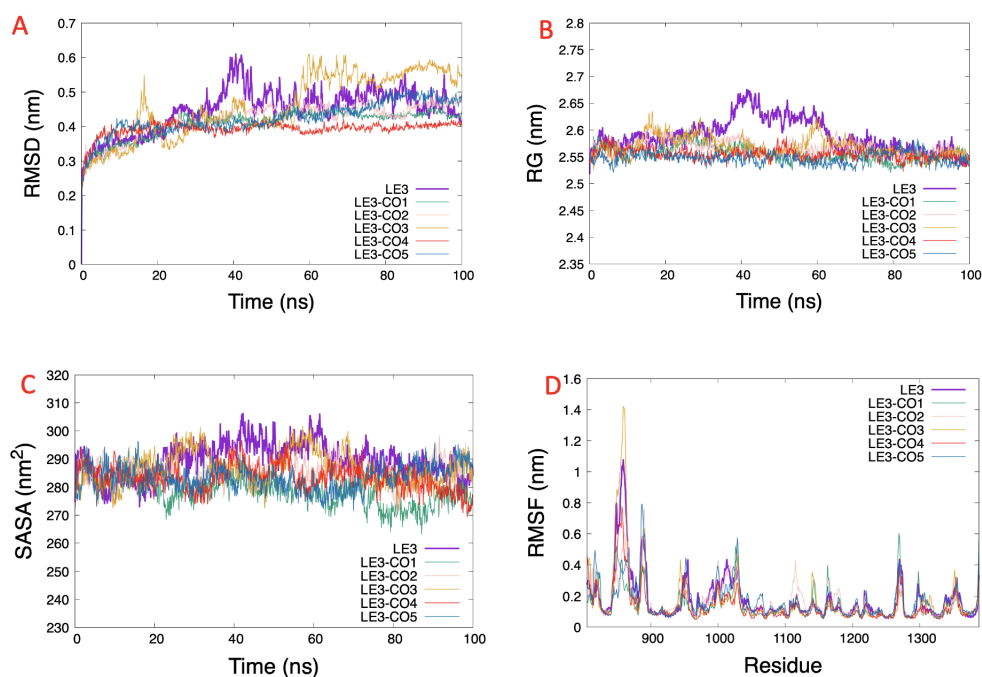

**Figure S3.** RMSD, SASA, and RG analysis of Putative AMP deaminase. (A) RMSD graph. (B) RG graph. (C) SASA graph. (D) RMSF graph.

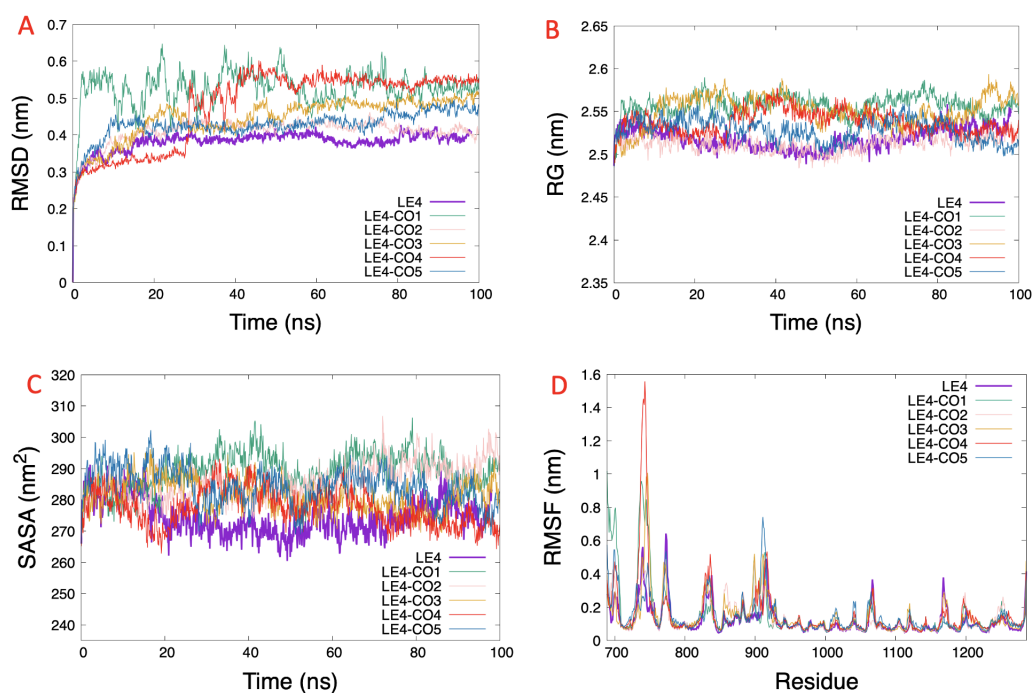

**Figure S4.** RMSD, SASA, and RG analysis of AMP deaminase. (A) RMSD graph. (B) RG graph. (C) SASA graph. (D) RMSF graph.

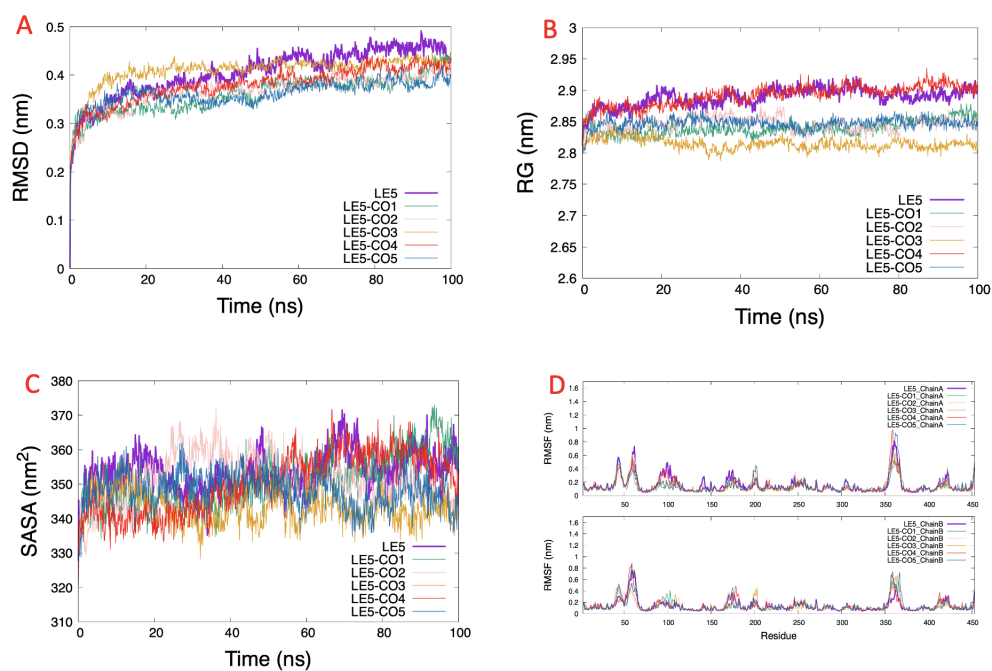

**Figure S5.** RMSD, SASA, and RG analysis of Guanine deaminase. (A) RMSD graph. (B) RG graph. (C) SASA graph. (D) RMSF graph.

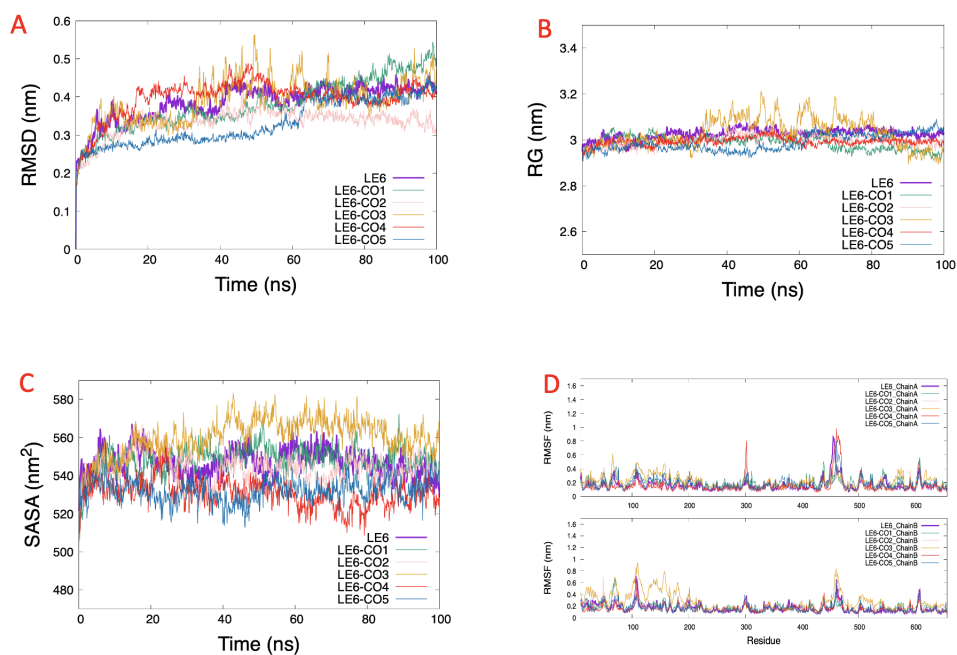

**Figure S6.** RMSD, SASA, and RG analysis of GMP synthase. (A) RMSD graph. (B) RG graph. (C) SASA graph. (D) RMSF graph.



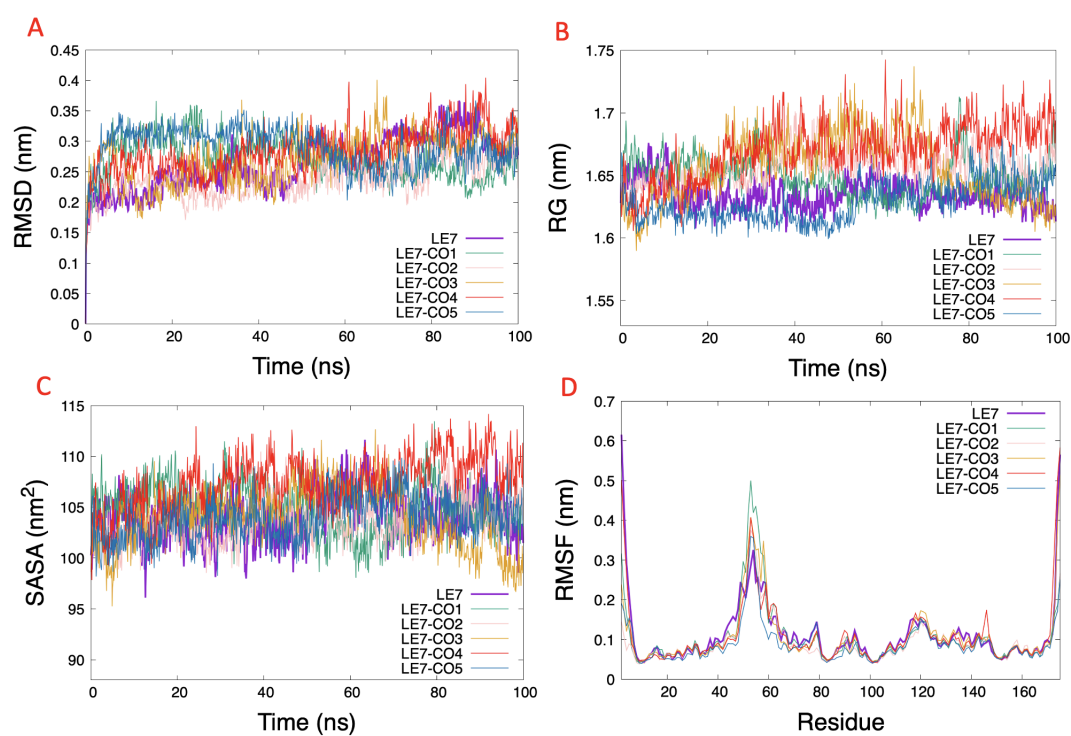

**Figure S7.** RMSD, SASA, and RG analysis of Adenylate kinase isoenzyme. (A) RMSD graph. (B) RG graph. (C) SASA graph. (D) RMSF graph.

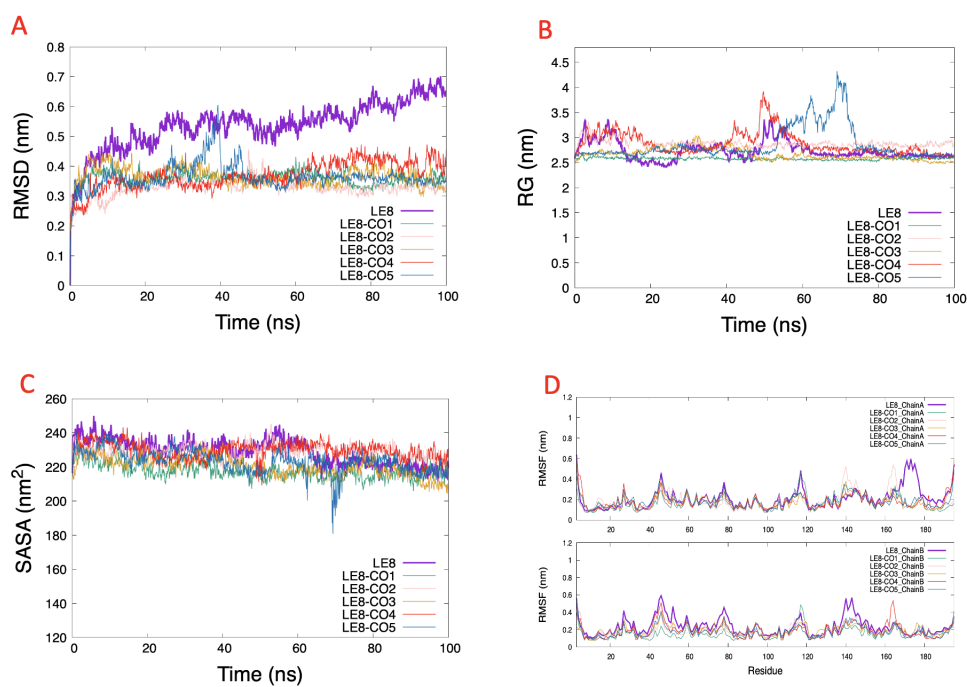

**Figure S8.** RMSD, SASA, and RG analysis of Guanylate kinase-like protein. (A) RMSD graph. (B) RG graph. (C) SASA graph. (D) RMSF graph.

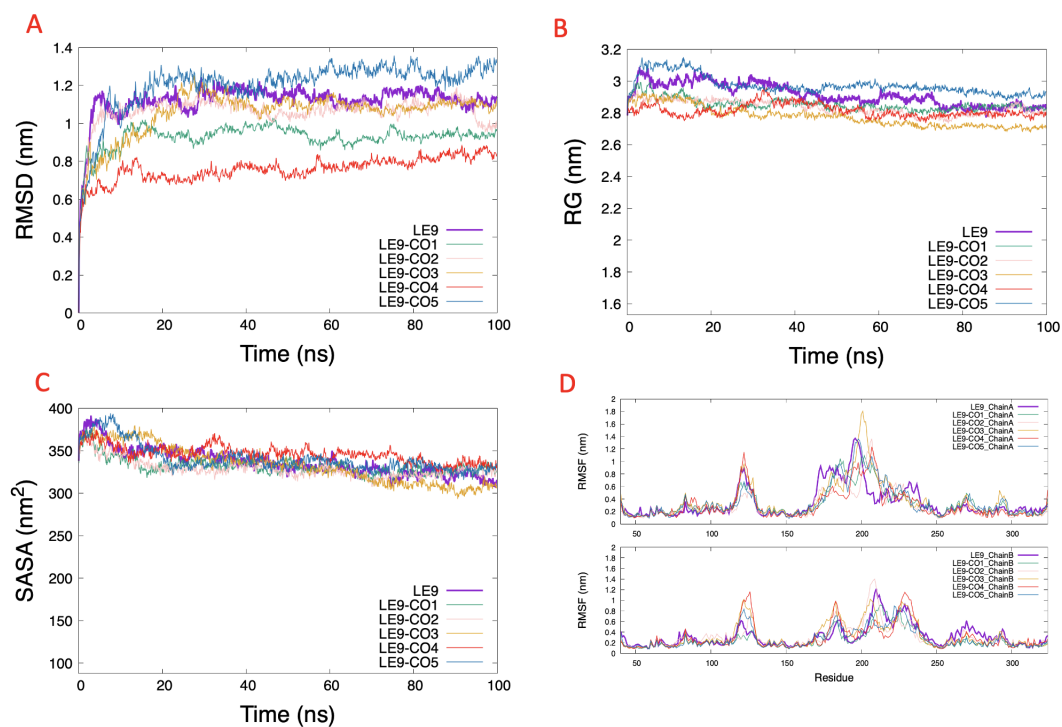

**Figure S9.** RMSD, SASA, and RG analysis of Guanylate kinase-like protein. (A) RMSD graph. (B) RG graph. (C) SASA graph. (D) RMSF graph.

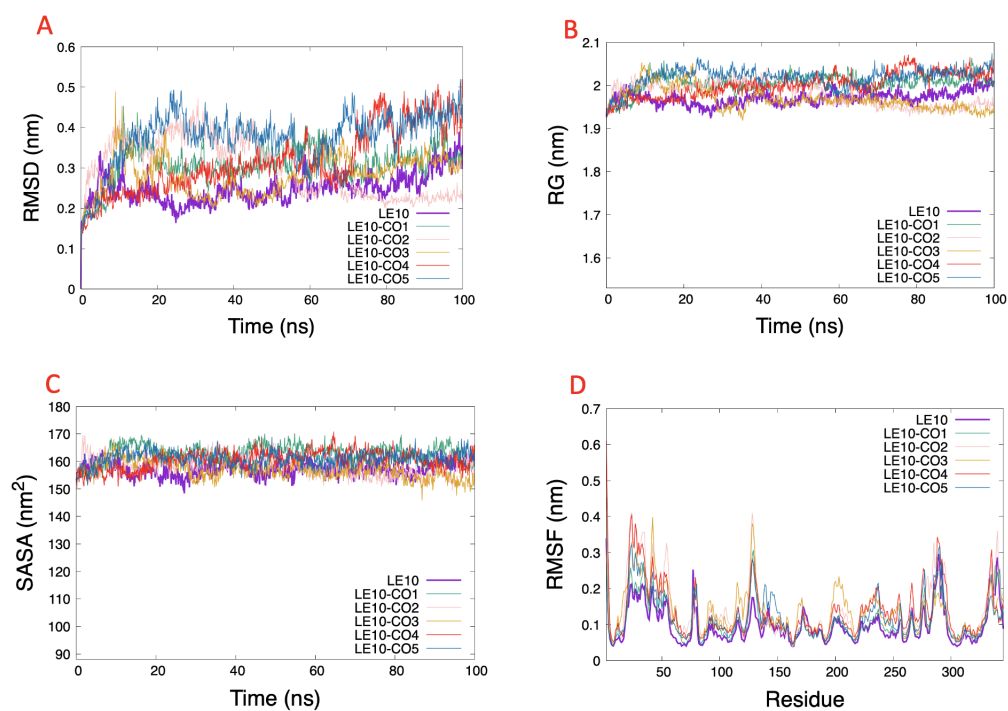

**Figure S10.** RMSD, SASA, and RG analysis of Adenosine kinase. (A) RMSD graph. (B) RG graph. (C) SASA graph. (D) RMSF graph.

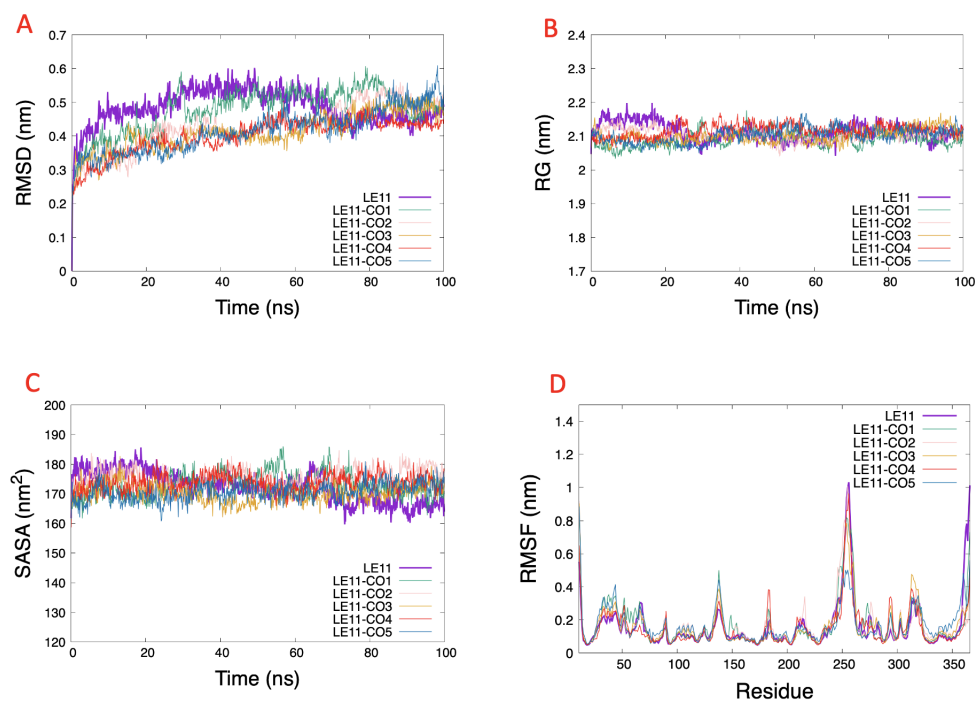

**Figure S11.** RMSD, SASA, and RG analysis of Adenosine kinase. (A) RMSD graph. (B) RG graph. (C) SASA graph. (D) RMSF graph.

**Table S1.** Quality values of the templates used in homology modeling through SwissModel server.

| Target                            | Template   | Seq Identity | Oligo-state   | QSQE | Found by    | Method       | Resolution | Seq Similarity | Range    | Coverage | Description                          |
|-----------------------------------|------------|--------------|---------------|------|-------------|--------------|------------|----------------|----------|----------|--------------------------------------|
| Adenine phosphoribosyltransferase | 1qb7.1.A   | 100          | homo-dimer    | 0.9  | BLAST       | X-ray        | 1.50Å      | 0.61           | 2 - 237  | 1        | Adenine Phosphoribosyltransferase    |
| Adenylosuccinate lyase            | 4efc.1.A   | 66.74        | homo-tetramer | 0.91 | HHblits     | X-ray        | 2.00Å      | 0.51           | 23 - 478 | 0.96     | Adenylosuccinate lyase               |
| Putative AMP deaminase            | A4I876.1.A | 100          | monomer       | -    | AFDB search | AlphaFold v2 | -          | 0.62           | 1 - 1612 | 1        | Putative AMP deaminase               |
| AMP deaminase                     | A4IC17.1.A | 100          | monomer       | -    | AFDB search | AlphaFold v2 | -          | 0.62           | 1 - 1472 | 1        | AMP deaminase                        |
| Guanine deaminase                 | A4I4E1.1.A | 100          | monomer       | -    | AFDB search | AlphaFold v2 | -          | 0.61           | 1 - 454  | 1        | Guanine deaminase                    |
| GMP synthase                      | E9AGZ1.1.A | 100          | monomer       | -    | AFDB search | AlphaFold v2 | -          | 0.61           | 1 - 656  | 1        | GMP synthase (glutamine-hydrolyzing) |
| Adenylate kinase isoenzyme 6      | A4I5L5.1.A | 100          | monomer       | -    | AFDB search | AlphaFold v2 | -          | 0.61           | 1 - 180  | 1        | Adenylate kinase isoenzyme 6 homolog |
| Guanylate kinase                  | A4I8X4.1.A | 100          | monomer       | -    | AFDB search | AlphaFold v2 | -          | 0.61           | 1 - 203  | 1        | guanylate kinase                     |
| Guanylate kinase-like             | A4IDK0.1.A | 100          | monomer       | -    | AFDB search | AlphaFold v2 | -          | 0.61           | 1 - 329  | 1        | Guanylate kinase-like protein        |
| Adenosine kinase                  | A4I5C0.1.A | 100          | monomer       | -    | AFDB search | AlphaFold v2 | -          | 0.61           | 1 - 345  | 1        | Adenosine kinase                     |
| Adenosine kinase                  | A4IAC6.1.A | 100          | monomer       | -    | AFDB search | AlphaFold v2 | -          | 0.61           | 1 - 388  | 1        | Adenosine kinase                     |

**Table S2.** RMSD, RG, and SASA average values of eleven targets over 100 ns of MD simulations.

| System  | RMSD (nm) | RG(nm)    | SASA(nm <sup>2</sup> ) |
|---------|-----------|-----------|------------------------|
| LE1     | 0.32±0.03 | 2.26±0.01 | 219.33±3.88            |
| LE1-CO1 | 0.30±0.04 | 2.24±0.01 | 216.14±3.98            |
| LE1-CO2 | 0.34±0.04 | 2.28±0.01 | 223.98±3.61            |
| LE1-CO3 | 0.30±0.03 | 2.27±0.01 | 223.84±3.28            |
| LE1-CO4 | 0.28±0.03 | 2.25±0.01 | 215.63±3.95            |
| LE1-CO5 | 0.30±0.04 | 2.26±0.01 | 220.18±3.48            |
| LE2     | 0.24±0.03 | 3.71±0.01 | 606.46±15.06           |
| LE2-CO1 | 0.23±0.03 | 3.71±0.01 | 599.43±13.79           |
| LE2-CO2 | 0.27±0.04 | 3.73±0.02 | 626.49±20.15           |
| LE2-CO3 | 0.24±0.03 | 3.72±0.02 | 606.64±15.38           |
| LE2-CO4 | 0.24±0.03 | 3.70±0.01 | 600.56±15.66           |
| LE2-CO5 | 0.25±0.03 | 3.73±0.02 | 615.86±18.40           |
| LE3     | 0.45±0.06 | 2.59±0.03 | 289.41±6.03            |
| LE3-CO1 | 0.41±0.04 | 2.56±0.01 | 278.67±5.23            |
| LE3-CO2 | 0.42±0.05 | 2.57±0.01 | 285.27±4.17            |
| LE3-CO3 | 0.46±0.09 | 2.57±0.02 | 286.61±5.77            |
| LE3-CO4 | 0.39±0.02 | 2.55±0.01 | 283.35±4.61            |
| LE3-CO5 | 0.42±0.05 | 2.55±0.01 | 283.56±4.56            |
| LE4     | 0.38±0.03 | 2.52±0.01 | 274.58±5.70            |
| LE4-CO1 | 0.53±0.05 | 2.56±0.01 | 289.16±5.79            |
| LE4-CO2 | 0.41±0.03 | 2.51±0.01 | 285.96±5.56            |
| LE4-CO3 | 0.45±0.06 | 2.55±0.02 | 281.28±5.06            |
| LE4-CO4 | 0.48±0.10 | 2.54±0.01 | 277.42±5.80            |
| LE4-CO5 | 0.43±0.04 | 2.53±0.01 | 284.31±5.85            |
| LE5     | 0.41±0.05 | 2.89±0.01 | 353.52±5.78            |
| LE5-CO1 | 0.36±0.04 | 2.84±0.01 | 350.91±7.54            |
| LE5-CO2 | 0.37±0.03 | 2.85±0.01 | 351.17±6.89            |
| LE5-CO3 | 0.41±0.03 | 2.81±0.01 | 343.00±4.68            |
| LE5-CO4 | 0.38±0.04 | 2.89±0.02 | 350.21±8.65            |
| LE5-CO5 | 0.36±0.03 | 2.85±0.01 | 348.12±5.16            |
| LE6     | 0.42±0.05 | 3.27±0.02 | 546.79±6.90            |
| LE6-CO1 | 0.41±0.06 | 3.27±0.02 | 548.53±7.16            |
| LE6-CO2 | 0.34±0.03 | 3.25±0.01 | 544.16±7.30            |
| LE6-CO3 | 0.64±0.20 | 3.42±0.09 | 560.05±10.14           |
| LE6-CO4 | 0.38±0.04 | 3.24±0.01 | 530.58±6.95            |
| LE6-CO5 | 0.36±0.06 | 3.24±0.01 | 532.00±6.30            |
| LE7     | 0.26±0.04 | 1.63±0.01 | 104.02±2.29            |
| LE7-CO1 | 0.27±0.03 | 1.65±0.02 | 104.94±2.40            |
| LE7-CO2 | 0.24±0.03 | 1.66±0.01 | 103.64±2.09            |
| LE7-CO3 | 0.27±0.04 | 1.66±0.03 | 104.12±2.87            |
| LE7-CO4 | 0.28±0.04 | 1.67±0.02 | 107.33±2.68            |
| LE7-CO5 | 0.29±0.03 | 1.63±0.02 | 103.93±2.16            |
| LE8     | 1.92±0.35 | 2.74±0.19 | 228.74±7.33            |
| LE8-CO1 | 0.77±0.10 | 2.58±0.02 | 217.54±4.39            |
| LE8-CO2 | 1.13±0.46 | 2.88±0.08 | 229.36±3.86            |
| LE8-CO3 | 1.75±0.42 | 2.66±0.11 | 220.50±5.81            |
| LE8-CO4 | 1.76±0.43 | 2.88±0.23 | 229.66±4.85            |
| LE8-CO5 | 1.49±0.70 | 2.86±0.33 | 223.38±6.65            |
| LE9     | 1.12±0.09 | 2.91±0.07 | 336.57±15.95           |
| LE9-CO1 | 0.93±0.07 | 2.85±0.04 | 331.73±9.93            |
| LE9-CO2 | 1.06±0.09 | 2.83±0.04 | 328.92±10.32           |
| LE9-CO3 | 1.06±0.12 | 2.78±0.06 | 333.52±21.72           |

**Table S2 continued from previous page**

|          |           |           |              |
|----------|-----------|-----------|--------------|
| LE9-CO4  | 0.76±0.07 | 2.81±0.04 | 345.85±9.48  |
| LE9-CO5  | 1.20±0.14 | 2.97±0.06 | 340.21±16.02 |
| LE10     | 0.25±0.04 | 1.97±0.02 | 157.31±2.65  |
| LE10-CO1 | 0.31±0.05 | 2.01±0.02 | 163.07±3.09  |
| LE10-CO2 | 0.30±0.07 | 1.98±0.03 | 158.15±3.24  |
| LE10-CO3 | 0.28±0.05 | 1.97±0.03 | 156.99±3.34  |
| LE10-CO4 | 0.32±0.08 | 2.00±0.03 | 160.48±3.28  |
| LE10-CO5 | 0.38±0.07 | 2.02±0.02 | 161.05±2.61  |
| LE11     | 0.48±0.05 | 2.11±0.03 | 172.44±5.12  |
| LE11-CO1 | 0.48±0.07 | 2.09±0.02 | 173.07±3.91  |
| LE11-CO2 | 0.43±0.07 | 2.10±0.02 | 175.27±3.30  |
| LE11-CO3 | 0.41±0.06 | 2.10±0.02 | 170.30±3.03  |
| LE11-CO4 | 0.40±0.05 | 2.12±0.02 | 173.80±2.87  |
| LE11-CO5 | 0.41±0.07 | 2.10±0.02 | 170.57±2.96  |

**Table S3.** Average value of the binding free energy determined by the MM/PBSA method.

| System   | $\Delta E_{VDWAALS}$ | $\Delta E_{EL}$ | $\Delta E_{PB}$ | $\Delta E_{NPOLAR}$ | $\Delta G_{GAS}$ | $\Delta G_{SOLV}$ | $\Delta G_{bind}$ |
|----------|----------------------|-----------------|-----------------|---------------------|------------------|-------------------|-------------------|
| LE1-CO1  | -12.15±10.09         | -4.88±6.57      | 13.00±11.71     | -9.90±8.67          | -17.03±14.00     | 20.49±16.58       | 3.46±4.03         |
| LE1-CO2  | -8.69±7.66           | -2.31±3.62      | 6.82±6.87       | -6.68±6.40          | -11.00±9.95      | 12.53±10.69       | 1.53±3.38         |
| LE1-CO3  | -21.24±5.79          | -4.44±6.75      | 15.67±7.72      | -16.82±4.46         | -25.68±9.08      | 26.51±9.37        | 0.84±3.25         |
| LE1-CO4  | -9.30±8.60           | -3.78±5.51      | 8.61±9.19       | -6.60±6.51          | -13.08±12.88     | 14.69±13.51       | 1.61±2.16         |
| LE1-CO5  | -12.57±8.47          | -5.69±7.03      | 12.21±9.47      | -9.36±6.58          | -18.26±13.38     | 19.90±13.37       | 1.64±2.78         |
| LE2-CO1  | -28.76±2.11          | -27.61±5.96     | 46.23±8.93      | -19.80±0.91         | -56.37±5.99      | 65.54±9.14        | 9.17±8.74         |
| LE2-CO2  | -26.70±2.50          | -10.27±6.63     | 22.59±12.21     | -18.91±1.91         | -36.97±7.77      | 43.05±12.21       | 6.08±9.20         |
| LE2-CO3  | -23.37±1.82          | -4.83±2.33      | 19.17±10.4      | -2.95±0.14          | -28.2±3.23       | 16.22±10.36       | -11.98±9.4        |
| LE2-CO4  | -25.76±2.16          | -16.21±6.70     | 30.18±12.90     | -20.00±1.71         | -41.97±7.46      | 49.69±12.97       | 7.71±9.29         |
| LE2-CO5  | -28.81±3.59          | -19.68±3.52     | 39.18±9.64      | -21.41±1.19         | -48.48±5.06      | 59.79±9.81        | 11.31±9.67        |
| LE3-CO1  | -26.50±3.71          | -21.77±4.50     | 29.32±4.06      | -21.10±2.41         | -48.27±5.40      | 44.02±4.47        | -4.26±3.64        |
| LE3-CO2  | -19.21±8.31          | -3.30±5.08      | 14.48±8.42      | -14.89±6.53         | -22.51±10.76     | 26.52±12.28       | 4.01±4.07         |
| LE3-CO3  | -31.48±2.88          | -27.71±4.77     | 41.53±4.95      | -23.10±1.28         | -59.19±4.68      | 60.55±5.15        | 1.36±4.24         |
| LE3-CO4  | -22.86±5.30          | -7.84±10.42     | 20.55±12.83     | -18.54±4.16         | -30.70±13.89     | 34.10±15.13       | 3.39±4.09         |
| LE3-CO5  | -23.39±2.79          | -0.93±4.37      | 12.42±4.55      | -17.74±1.91         | -24.32±4.63      | 25.99±4.77        | 1.66±3.20         |
| LE4-CO1  | -6.14±7.01           | -11.92±14.78    | 13.06±15.4      | -5.14±6.46          | -18.05±21.38     | 16.83±18.43       | -1.23±4.14        |
| LE4-CO2  | -20.1±3.06           | -1.92±5.51      | 12.24±6.52      | -15.63±2.46         | -22.02±6.6       | 25.48±7.71        | 3.46±3            |
| LE4-CO3  | -25.82±2.48          | -7.63±2.98      | 24.92±4.77      | -19.14±1.61         | -33.45±3.89      | 40.5±5.07         | 7.05±4.33         |
| LE4-CO4  | -0.39±1.57           | -0.23±1.54      | 0.42±2.08       | 0.23±1.56           | -0.62±2.58       | 1.39±2.94         | 0.77±0.79         |
| LE4-CO5  | -28.65±2.23          | -4.4±2.5        | 16.99±3.75      | -20.53±1.27         | -33.05±3.69      | 33.99±4.46        | 0.94±3.74         |
| LE5-CO1  | -32.3±2.33           | -25.88±5.43     | 50.12±5.38      | -23.07±1            | -58.18±6.02      | 67.68±5.39        | 9.51±4.18         |
| LE5-CO2  | -3.76±5.54           | -0.27±2.31      | 2.48±4.61       | -2.52±4.57          | -4.03±6.34       | 5.61±8.05         | 1.58±2.42         |
| LE5-CO3  | -0.11±0.39           | 0.05±1.72       | -0.02±2.63      | 0.5±0.39            | -0.07±1.94       | 0.71±2.78         | 0.64±1.93         |
| LE5-CO4  | -29.25±2.54          | -12.51±4.94     | 27.23±4.48      | -21.65±1.23         | -41.75±5.67      | 41.57±4.61        | -0.18±3.36        |
| LE5-CO5  | -12.29±4.04          | -10.8±9.56      | 14.66±8.75      | -10.24±3.17         | -23.09±12.43     | 21.53±10.21       | -1.56±3.65        |
| LE6-CO1  | -17.68±4.26          | -16.57±13.47    | 28.85±12.63     | -13.58±3.04         | -34.24±13.90     | 42.22±13.59       | 7.98±4.42         |
| LE6-CO2  | -12.85±6.11          | -2.36±4.77      | 8.76±5.82       | -9.82±4.77          | -15.21±8.40      | 16.14±7.82        | 0.93±2.26         |
| LE6-CO3  | -16.06±5.91          | -2.02±3.23      | 11.36±5.66      | -12.79±4.83         | -18.08±7.19      | 21.82±8.10        | 3.74±3.18         |
| LE6-CO4  | -29.21±2.60          | -9.81±4.53      | 26.88±4.64      | -21.47±1.61         | -39.02±5.31      | 44.80±5.31        | 5.78±4.33         |
| LE6-CO5  | -16.75±4.68          | -1.02±5.45      | 9.59±5.88       | -13.76±3.52         | -17.77±6.92      | 20.60±6.99        | 2.83±2.68         |
| LE7-CO1  | -9.91±6.34           | -2.66±7.53      | 7.53±8.25       | -7.71±5.27          | -12.57±10.18     | 13.17±10.06       | 0.6±2.29          |
| LE7-CO2  | -13.79±3.98          | -1.18±5.25      | 6.99±5.41       | -10.41±2.61         | -14.97±6.62      | 14.96±6.01        | -0.01±1.91        |
| LE7-CO3  | -3.52±5.21           | 0.08±3.59       | 2.04±4.67       | -2.27±4.07          | -3.44±6.38       | 4.43±6.21         | 0.99±1.36         |
| LE7-CO4  | -0.32±1.25           | -1.02±5.15      | 1.41±5.48       | 0.34±1.05           | -1.34±5.63       | 2.33±6            | 0.99±0.96         |
| LE7-CO5  | -7.14±8.3            | -2.01±6.98      | 5.5±9.59        | -5.11±6.56          | -9.15±13.35      | 9.76±12.7         | 0.62±1.84         |
| LE8-CO1  | -0.50±1.93           | -0.19±2.29      | 0.47±2.70       | 0.14±1.71           | -0.70±3.31       | 1.40±3.46         | 0.71±0.70         |
| LE8-CO2  | -22.19±7.50          | -3.07±4.64      | 13.22±6.45      | -17.66±5.91         | -25.26±9.90      | 24.48±8.87        | -0.78±3.12        |
| LE8-CO3  | -11.68±6.34          | -2.88±5.08      | 9.05±7.70       | -9.01±5.06          | -14.57±9.35      | 16.39±10.64       | 1.82±3.41         |
| LE8-CO4  | -21.59±5.42          | -17.67±12.46    | 26.47±11.88     | -17.60±4.15         | -39.26±15.13     | 37.74±13.34       | -1.53±3.56        |
| LE8-CO5  | -0.75±2.43           | -0.45±3.68      | 0.87±4.28       | -0.11±2.34          | -1.20±5.04       | 1.98±5.34         | 0.78±0.84         |
| LE9-CO1  | -33.20±2.19          | -28.73±5.37     | 55.31±6.65      | -23.24±1.09         | -61.93±5.90      | 72.76±6.72        | 10.72±5.52        |
| LE9-CO2  | -6.94±6.58           | -1.36±3.78      | 4.73±5.32       | -5.03±5.17          | -8.30±8.37       | 9.26±8.23         | 0.96±1.75         |
| LE9-CO3  | -24.24±2.55          | -13.23±3.84     | 21.66±3.27      | -20.37±1.47         | -37.47±5.01      | 34.23±3.49        | -3.24±3.06        |
| LE9-CO4  | -27.25±2.72          | -24.82±10.07    | 40.06±8.79      | -22.10±1.61         | -52.06±10.55     | 55.10±8.95        | 3.04±4.98         |
| LE9-CO5  | -21.24±5.06          | -10.09±9.22     | 22.08±9.40      | -16.82±3.60         | -31.33±10.99     | 34.88±10.79       | 3.56±3.43         |
| LE10-CO1 | -31.32±2.24          | -17.38±4.1      | 33.49±2.83      | -23.58±0.91         | -48.7±4.16       | 47.84±2.91        | -0.85±3.47        |
| LE10-CO2 | -32.79±1.89          | -15.74±3.38     | 31±2.82         | -22.8±0.71          | -48.53±3.32      | 49.29±2.83        | 0.76±3.15         |
| LE10-CO3 | -30.79±2.44          | -4.05±2.21      | 24.41±3.54      | -23.85±1.46         | -34.83±3.83      | 39.98±3.74        | 5.15±3.01         |
| LE10-CO4 | -14.34±4.94          | -3.49±4.39      | 10.72±5.91      | -11.32±3.75         | -17.83±7.47      | 19.77±7.66        | 1.94±3.27         |
| LE10-CO5 | -18.95±3.16          | -5.67±4.02      | 14.05±3.45      | -15.5±2.41          | -24.62±5.5       | 24.22±4.13        | -0.39±2.87        |
| LE11-CO1 | -24.53±4.35          | -23.20±13.64    | 35.92±14.94     | -20.46±2.98         | -47.73±16.64     | 50.10±16.15       | 2.36±4.48         |
| LE11-CO2 | -30.77±2.91          | -8.21±4.48      | 22.02±5.18      | -22.66±1.64         | -38.98±5.29      | 38.80±6.20        | -0.18±4.41        |
| LE11-CO3 | -22.57±3.94          | -2.31±3.85      | 12.06±5.22      | -18.45±2.23         | -24.88±6.68      | 25.32±6.46        | 0.43±3.26         |
| LE11-CO4 | -9.30±10.33          | -5.99±8.69      | 10.15±12.13     | -7.04±8.22          | -15.29±17.34     | 15.82±17.01       | 0.52±3.09         |
| LE11-CO5 | -20.36±3.47          | -1.97±4.14      | 10.77±5.48      | -17.79±2.67         | -22.33±5.28      | 23.91±6.37        | 1.58±3.12         |

$E_{VDWAALS}$  = Van der Waals energy;  $E_{EL}$  = Electrostatic energy;  $E_{PB}$  = Electrostatic contribution free energy calculated by Poisson-Boltzmann;  $E_{NPOLAR}$  : Non-polar solvation energy;  $\Delta G_{gas}$  = Estimated binding free energy phase gas;  $\Delta G_{solv}$  = Estimates binding free energy solvent;  $\Delta G_{bind}$  = Estimated binding free energy. All values are in kcal/mol.



**Table S4.** Average value of the binding free energy determined by the MM/GBSA method.

| System   | $\Delta E_{VDWAALS}$ | $\Delta E_{EL}$ | $\Delta E_{GB}$ | $\Delta E_{SURF}$ | $\Delta G_{GAS}$ | $\Delta G_{SOLV}$ | $\Delta G_{bind}$ |
|----------|----------------------|-----------------|-----------------|-------------------|------------------|-------------------|-------------------|
| LE1-CO1  | -15.35±6.05          | -9.04±8.39      | 18.56±9.45      | -2.2±1.03         | -24.39±11.79     | 16.36±8.77        | -8.03±3.89        |
| LE1-CO2  | -6.68±7.32           | -1.44±3.13      | 5.12±5.79       | -0.98±1.1         | -8.12±9.15       | 4.14±4.85         | -3.98±4.97        |
| LE1-CO3  | -14.71±8.8           | -6.93±7.51      | 14.15±10.22     | -2.21±1.34        | -21.64±14.67     | 11.93±9.06        | -9.7±6.39         |
| LE1-CO4  | -16.06±3.5           | -5.23±6.13      | 13.68±6.37      | -2.14±0.44        | -21.29±7.04      | 11.54±6.17        | -9.75±2.71        |
| LE1-CO5  | -8.24±9.09           | -0.93±6.18      | 5.41±7.65       | -1.27±1.39        | -9.17±11.21      | 4.14±6.86         | -5.03±6.02        |
| LE2-CO1  | -28.56±1.84          | -24.4±4.56      | 37.48±2.93      | -3.66±0.17        | -52.97±4.46      | 33.82±2.9         | -19.15±2.42       |
| LE2-CO2  | -24.95±2.49          | -6.34±3.19      | 17.64±4.06      | -3±0.38           | -31.29±5.07      | 14.64±3.75        | -16.66±2.06       |
| LE2-CO3  | -23.97±1.76          | -4.44±1.81      | 14.37±1.52      | -2.93±0.2         | -28.41±2.6       | 11.44±1.48        | -16.97±1.82       |
| LE2-CO4  | -27.09±1.72          | -20.87±4.49     | 30.37±2.72      | -3.91±0.23        | -47.96±4.85      | 26.46±2.61        | -21.5±2.86        |
| LE2-CO5  | -25.74±1.72          | -19.01±3.61     | 27.22±2.21      | -3.74±0.2         | -44.75±3.26      | 23.48±2.16        | -21.27±2          |
| LE3-CO1  | -23.62±3.78          | -22.20±4.51     | 25.46±3.61      | -3.39±0.43        | -45.82±5.11      | 22.07±3.52        | -23.75±3.58       |
| LE3-CO2  | -6.10±7.30           | -1.44±5.30      | 5.47±7.53       | -0.88±1.04        | -7.54±10.26      | 4.60±6.69         | -2.95±4.10        |
| LE3-CO3  | -32.79±2.55          | -26.62±3.44     | 32.59±2.15      | -4.53±0.19        | -59.41±3.80      | 28.06±2.10        | -31.35±3.06       |
| LE3-CO4  | -18.50±4.64          | 0.24±4.02       | 9.31±3.75       | -2.70±0.85        | -18.26±4.53      | 6.61±3.74         | -11.64±3.30       |
| LE3-CO5  | -25.62±2.19          | 1.05±4.02       | 14.12±3.72      | -3.39±0.21        | -24.57±4.58      | 10.73±3.68        | -13.84±2.15       |
| LE4-CO1  | -6.14±7.01           | -11.92±14.78    | 13.52±15.2      | -0.99±1.11        | -18.05±21.38     | 12.54±14.13       | -5.51±7.83        |
| LE4-CO2  | -20.1±3.06           | -1.92±5.51      | 12.86±5.53      | -2.82±0.44        | -22.02±6.6       | 10.03±5.34        | -11.99±2.83       |
| LE4-CO3  | -25.82±2.48          | -7.63±2.98      | 21.43±2.79      | -3.6±0.38         | -33.45±3.89      | 17.83±2.61        | -15.63±2.42       |
| LE4-CO4  | -0.39±1.57           | -0.23±1.54      | 0.67±2.28       | -0.05±0.25        | -0.62±2.58       | 0.62±2.08         | 0±0.74            |
| LE4-CO5  | -28.65±2.23          | -4.4±2.5        | 18.68±2.61      | -3.51±0.23        | -33.05±3.69      | 15.17±2.6         | -17.88±2.01       |
| LE5-CO1  | -32.3±2.33           | -25.88±5.43     | 39.17±3.78      | -4.16±0.2         | -58.18±6.02      | 35.02±3.68        | -23.16±3.33       |
| LE5-CO2  | -3.76±5.54           | -0.27±2.31      | 2.64±4.41       | -0.48±0.71        | -4.03±6.34       | 2.16±3.83         | -1.88±2.89        |
| LE5-CO3  | -0.11±0.39           | 0.05±1.72       | 0.14±1.89       | -0.01±0.06        | -0.07±1.94       | 0.13±1.86         | 0.06±0.25         |
| LE5-CO4  | -29.25±2.54          | -12.51±4.94     | 23.65±3.68      | -3.98±0.22        | -41.75±5.67      | 19.67±3.61        | -22.08±3.01       |
| LE5-CO5  | -12.29±4.04          | -10.8±9.56      | 14.29±8.31      | -1.77±0.51        | -23.09±12.43     | 12.53±7.96        | -10.57±4.97       |
| LE6-CO1  | -13.38±2.86          | -11.58±7.04     | 23.06±6.07      | -1.9±0.45         | -24.96±7.85      | 21.16±5.84        | -3.8±2.86         |
| LE6-CO2  | -12.51±6.02          | -1.94±4.03      | 7.8±4.99        | -1.66±0.81        | -14.45±7.52      | 6.14±4.56         | -8.31±4.49        |
| LE6-CO3  | -15.8±3.75           | -2.24±4.09      | 11.59±4.45      | -2.3±0.63         | -18.04±6.68      | 9.29±4.03         | -8.75±3.45        |
| LE6-CO4  | -28.98±2.13          | -7.86±4.08      | 21.83±2.81      | -3.73±0.24        | -36.84±4.83      | 18.1±2.7          | -18.74±2.72       |
| LE6-CO5  | -21.98±4.36          | -1.65±7.37      | 15.67±7.41      | -3.04±0.57        | -23.63±8.19      | 12.64±7.36        | -10.99±3.35       |
| LE7-CO1  | -9.91±6.34           | -2.66±7.53      | 8.09±8.11       | -1.41±0.91        | -12.57±10.18     | 6.68±7.73         | -5.89±4.46        |
| LE7-CO2  | -13.79±3.98          | -1.18±5.25      | 8.02±5.32       | -1.87±0.49        | -14.97±6.62      | 6.15±5.24         | -8.82±3.35        |
| LE7-CO3  | -3.52±5.21           | 0.08±3.59       | 1.91±4.43       | -0.48±0.68        | -3.44±6.38       | 1.44±4.09         | -2.01±3.57        |
| LE7-CO4  | -0.32±1.25           | -1.02±5.15      | 1.49±5.6        | -0.04±0.18        | -1.34±5.63       | 1.45±5.53         | 0.12±0.52         |
| LE7-CO5  | -7.14±8.3            | -2.01±6.98      | 5.56±9.48       | -1.02±1.18        | -9.15±13.35      | 4.54±8.59         | -4.6±5.91         |
| LE8-CO1  | -0.11±0.41           | -0.35±2.38      | 0.59±2.5        | -0.02±0.09        | -0.45±2.54       | 0.58±2.42         | 0.12±0.37         |
| LE8-CO2  | -11.87±9.44          | -1.29±4.89      | 7.85±6.47       | -1.74±1.41        | -13.16±10.42     | 6.1±5.55          | -7.06±6.25        |
| LE8-CO3  | -1.32±3.22           | -0.33±1.95      | 1.25±3.17       | -0.2±0.48         | -1.65±4.45       | 1.05±2.76         | -0.61±1.96        |
| LE8-CO4  | -25.85±2.48          | -10.46±4.1      | 20.69±4.28      | -3.7±0.33         | -36.31±5.43      | 16.99±4.11        | -19.32±2.25       |
| LE8-CO5  | -0.69±2.09           | -0.39±4.25      | 0.99±4.2        | -0.1±0.33         | -1.07±4.7        | 0.9±4.1           | -0.17±1.14        |
| LE9-CO1  | -32.98±2.01          | -28.55±4.67     | 43.02±3.97      | -4.24±0.17        | -61.53±4.92      | 38.78±3.93        | -22.75±2          |
| LE9-CO2  | -2.81±4.05           | -0.73±2.69      | 2.47±3.95       | -0.4±0.58         | -3.54±5.76       | 2.06±3.49         | -1.48±2.69        |
| LE9-CO3  | -25.28±2.66          | -15.09±2.71     | 24.58±2.72      | -3.82±0.27        | -40.37±3.91      | 20.76±2.57        | -19.61±2.08       |
| LE9-CO4  | -26.83±3.3           | -27.06±11.9     | 38.81±9.37      | -4.04±0.43        | -53.88±13.08     | 34.77±9.14        | -19.12±4.55       |
| LE9-CO5  | -19.92±3.47          | -14.25±11.93    | 24.54±9.91      | -3.09±0.41        | -34.17±11.4      | 21.45±9.9         | -12.73±3.16       |
| LE10-CO1 | -31.32±2.24          | -17.38±4.1      | 28.53±2.64      | -4.52±0.15        | -48.7±4.16       | 24.01±2.59        | -24.68±2.68       |
| LE10-CO2 | -32.79±1.89          | -15.74±3.38     | 23.96±2         | -4.36±0.13        | -48.53±3.32      | 19.6±2.01         | -28.93±2.36       |
| LE10-CO3 | -30.79±2.44          | -4.05±2.21      | 17.17±2.39      | -4.71±0.3         | -34.83±3.83      | 12.46±2.21        | -22.37±2.53       |
| LE10-CO4 | -14.34±4.94          | -3.49±4.39      | 10.96±4.91      | -2.02±0.73        | -17.83±7.47      | 8.95±4.39         | -8.88±3.95        |
| LE10-CO5 | -18.95±3.16          | -5.67±4.02      | 13.35±3.08      | -2.76±0.44        | -24.62±5.5       | 10.59±2.9         | -14.03±3.42       |
| LE11-CO1 | -27.1±2.49           | -30.99±4.99     | 39.91±3.29      | -4.15±0.18        | -58.09±4.52      | 35.76±3.25        | -22.33±2.47       |
| LE11-CO2 | -32.19±1.89          | -10.39±2.98     | 22.29±2.37      | -4.3±0.22         | -42.58±3.8       | 17.99±2.25        | -24.6±2.28        |
| LE11-CO3 | -24.11±2.16          | -5.07±2.88      | 14.41±1.91      | -3.65±0.23        | -29.18±3.92      | 10.76±1.86        | -18.42±2.88       |
| LE11-CO4 | -23.48±5.45          | -9.12±3.31      | 17.45±3.15      | -3.34±0.76        | -32.6±7.16       | 14.11±2.78        | -18.48±5.55       |
| LE11-CO5 | -22.3±3.34           | 0.94±2.61       | 10.86±3.29      | -3.22±0.54        | -21.36±4.67      | 7.64±3            | -13.73±2.39       |

$E_{VDWAALS}$  = Van der Waals energy;  $E_{EL}$  = Electrostatic energy;  $E_{GB}$  = Electrostatic contribution free energy calculated by Generalized Born;  $E_{SURF}$  = Non-polar contribution calculated based on the solvent-accessible surface area;  $\Delta G_{gas}$  = Estimated binding free energy phase gas;  $\Delta G_{solv}$  = estimates binding free energy solvent;  $\Delta G_{bind}$  = Estimated binding free energy. All values are in kcal/mol.
